# Supplementary material for: Long-afterglow metal–organic frameworks: reversible guest-induced phosphorescence tunability
Source: PubMed Central journal article supplement (PMC6016333; doi:10.1039/c6sc00563b), 2016-03-24
Supplement: SC-007-C6SC00563B-s001.pdf [file SC-007-C6SC00563B-s001.pdf]

## Electronic Supplementary Information

### Long-afterglow Metal-Organic Frameworks: Reversible Guest-induced Phosphorescence Tunability

Xiaogang Yang<sup>a</sup> and Dongpeng Yan<sup>\*a,b</sup>

<sup>a</sup> Key Laboratory of Theoretical and Computational Photochemistry, Ministry of Education, College of Chemistry, Beijing Normal University, Beijing 100875 (P. R. China). E-mail: [yandp@bnu.edu.cn](mailto:yandp@bnu.edu.cn)

<sup>b</sup> State Key Laboratory of Chemical Resource Engineering, Beijing University of Chemical Technology, Beijing 100029, (P. R. China).

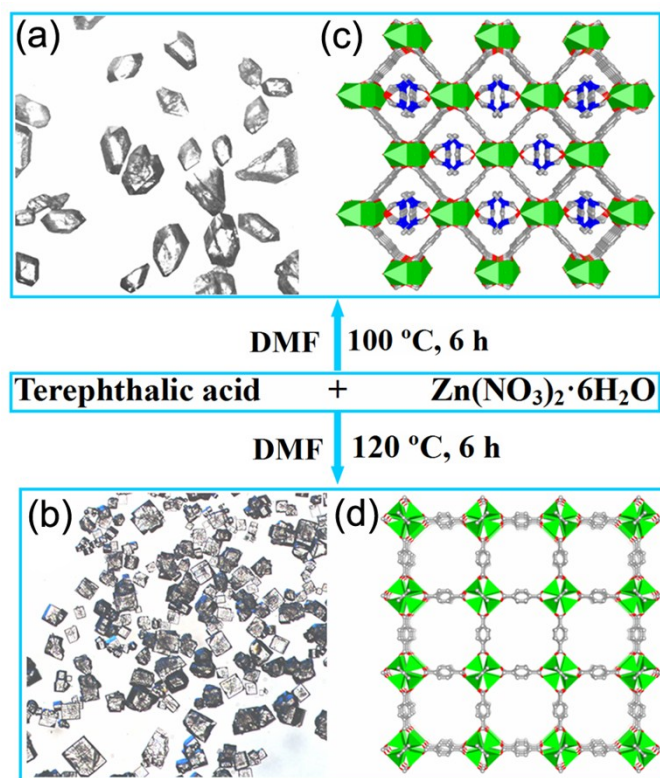

**Figure S1.** Scheme for synthesis of **1-DMF** (a) and **MOF-5** (b) single crystals; single crystal structure of **1-DMF** (c) and **MOF-5** (d). Hydrogen atoms have been omitted for clarity. C, grey; N, blue; O, red; Zn, green.

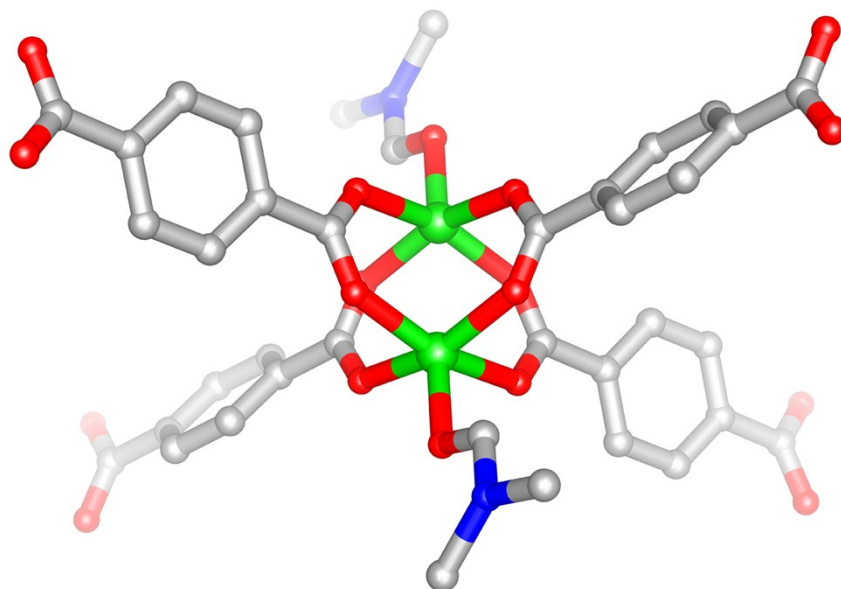

**Figure S2.** Ball-and-stick view of the paddle-wheel unit in **1-DMF**.

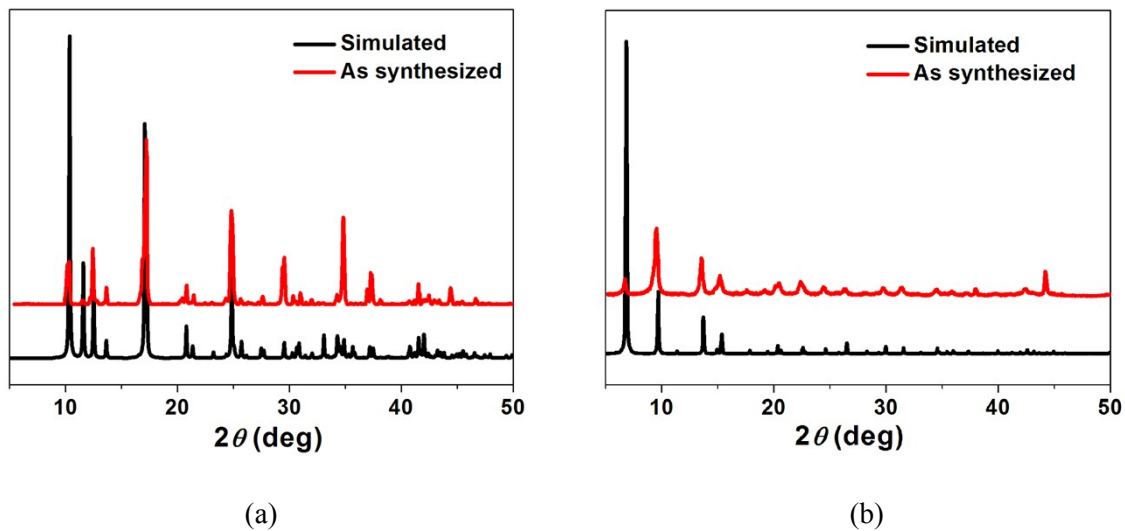

**Figure S3.** Simulated and as synthesized PXRD patterns of **1-DMF** and **MOF-5**.

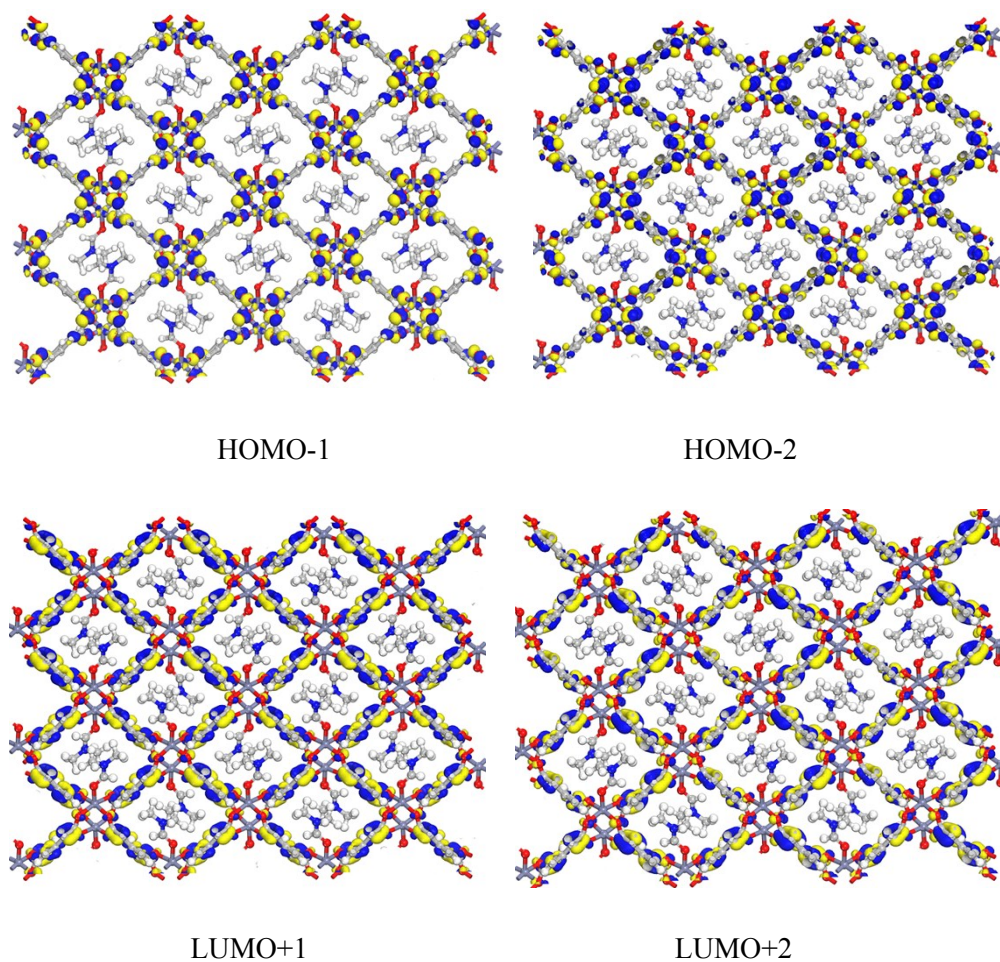

**Figure S4.** The electron-density distribution of various orbitals involved in **1-DMF**.

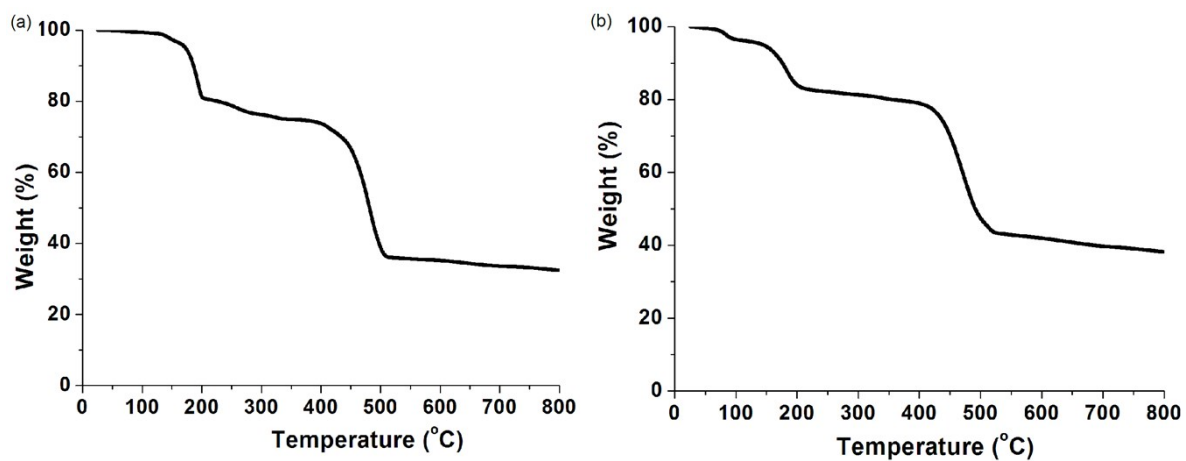

**Figure S5.** Thermogravimetric (TG) analysis curves of **1-DMF** (a) and **MOF-5** (b).

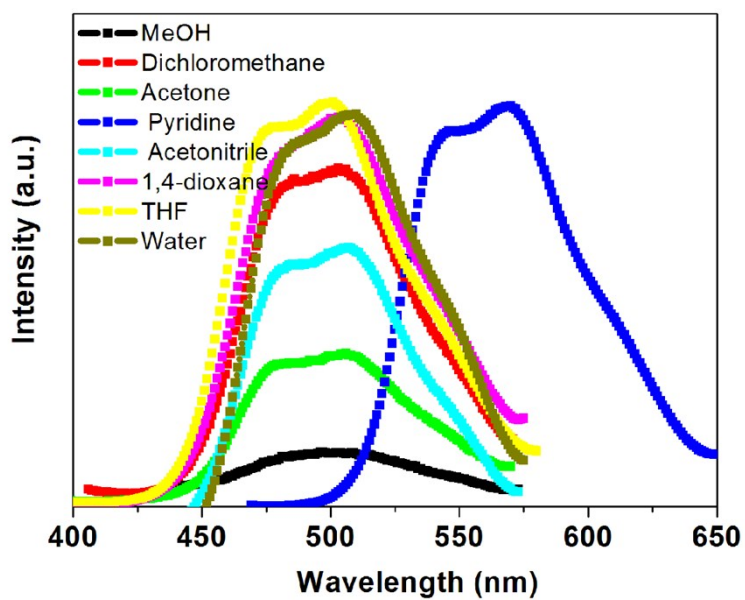

**Figure S6.** Phosphorescence spectra of **1-DMF** after immersing in different solvents.

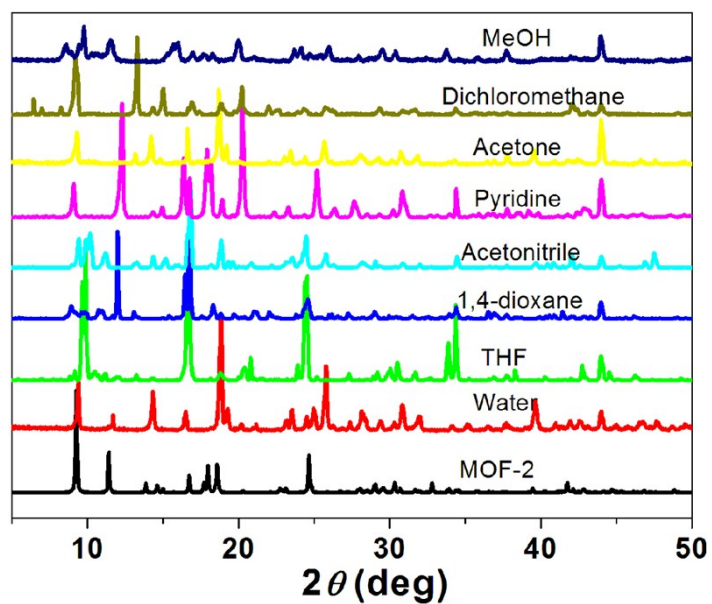

Figure S7. PXRD patterns of MOF-2 and 1-DMF after immersing in different solvents.

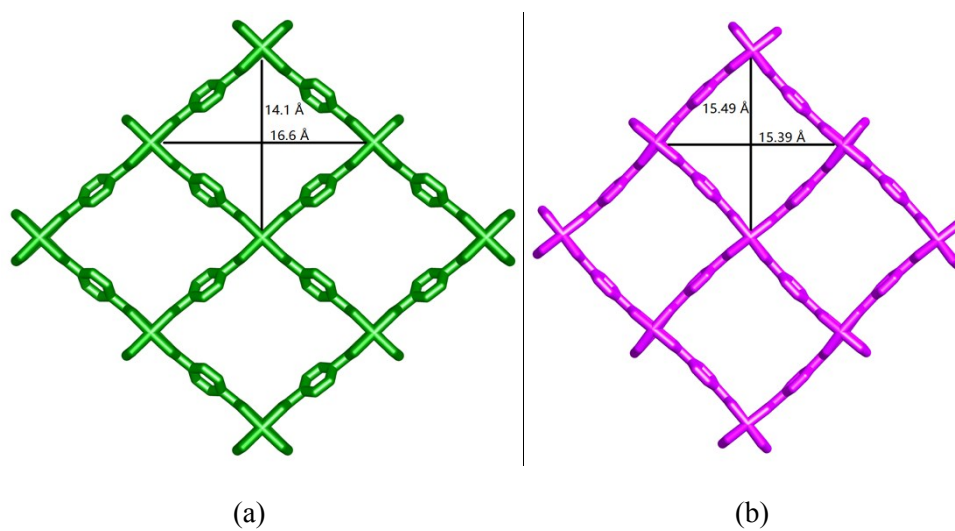

Figure S8. View of the 2D layer for 1-DMF (a) and MOF-2 (b).

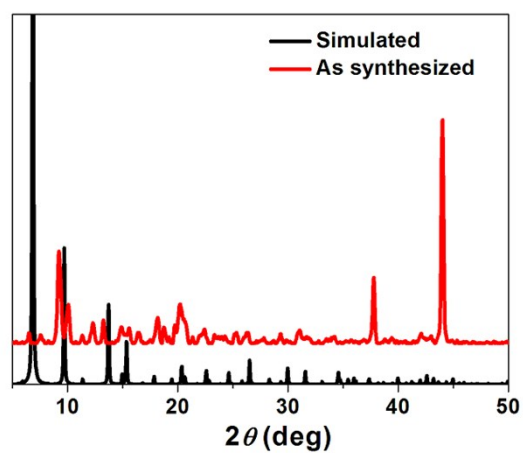

**Figure S9.** PXRD patterns of **MOF-5** treated with pyridine.

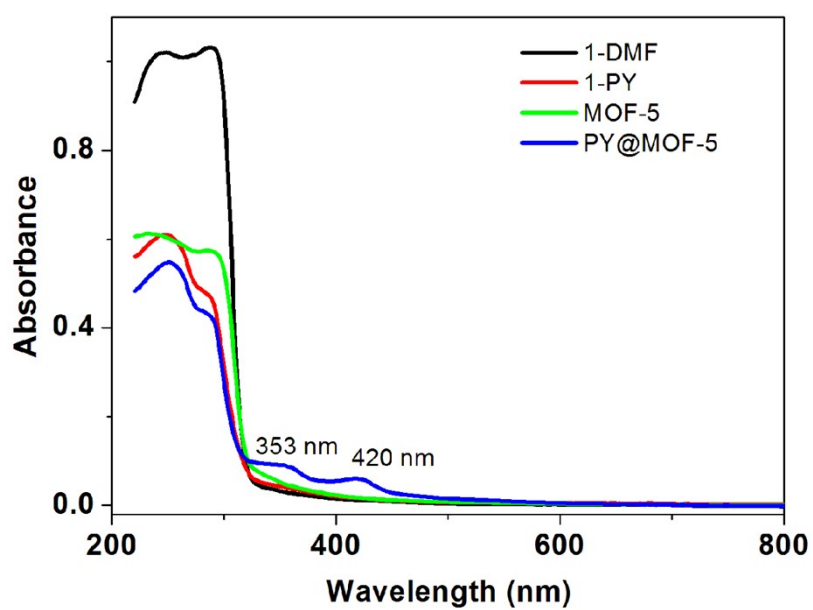

**Figure S10.** UV-visible absorption spectra for **1-DMF** and **MOF-5** and the samples after pyridine treatment.

**Table S1.** Crystallographic data for **1-DMF**<sup>a</sup>.

| Compound                                       | <b>1-DMF</b>                                                      |
|------------------------------------------------|-------------------------------------------------------------------|
| Formula                                        | C <sub>11</sub> H <sub>6</sub> ZnNO <sub>5</sub>                  |
| Formula weight                                 | 297.54                                                            |
| Crystal system                                 | Monoclinic                                                        |
| Space group                                    | <i>C2/m</i>                                                       |
| <i>a</i> (Å)                                   | 11.191(6)                                                         |
| <i>b</i> (Å)                                   | 14.136(8)                                                         |
| <i>c</i> (Å)                                   | 7.975(5)                                                          |
| $\alpha$ (°)                                   | 90                                                                |
| $\beta$ (°)                                    | 106.894(7)                                                        |
| $\gamma$ (°)                                   | 90                                                                |
| <i>V</i> (Å <sup>3</sup> )                     | 1207.2(12)                                                        |
| <i>Z</i>                                       | 4                                                                 |
| <i>D<sub>c</sub></i> (g/cm <sup>3</sup> )      | 1.637                                                             |
| Abs. coeff. /mm <sup>-1</sup>                  | 2.045                                                             |
| <i>F</i> (000)                                 | 596                                                               |
| $\theta$ range for data collection (°)         | 2.39 / 25.49                                                      |
| GOF                                            | 1.236                                                             |
| <i>R</i> [ <i>I</i> > 2 $\sigma$ ( <i>I</i> )] | <i>R</i> <sub>1</sub> = 0.0520<br><i>wR</i> <sub>2</sub> = 0.1497 |
| <i>R</i> (all data)                            | <i>R</i> <sub>1</sub> = 0.0532<br><i>wR</i> <sub>2</sub> = 0.1501 |

<sup>a</sup>  $R = [\sum ||F_0| - |F_c|| / \sum |F_0|]$ ,  $R_w = \sum_w [|F_0|^2 - |F_c|^2|^2 / \sum_w (|F_w|^2)^2]^{1/2}$

**Table S2.** Selected bond lengths (Å) and angles (°) for **1-DMF**.

|                     |          |                     |          |
|---------------------|----------|---------------------|----------|
| Zn(1)-O(3)          | 1.988(7) | Zn(1)-O(2)#1        | 2.017(5) |
| Zn(1)-O(2)#2        | 2.017(5) | Zn(1)-O(1)          | 2.037(5) |
| Zn(1)-O(1)#3        | 2.037(5) |                     |          |
| O(3)-Zn(1)-O(2)#1   | 103.4(2) | O(3)-Zn(1)-O(2)#2   | 103.4(2) |
| O(2)#1-Zn(1)-O(2)#2 | 85.6(3)  | O(3)-Zn(1)-O(1)     | 97.2(2)  |
| O(2)#1-Zn(1)-O(1)   | 159.4(2) | O(2)#2-Zn(1)-O(1)   | 89.7(2)  |
| O(3)-Zn(1)-O(1)#3   | 97.2(2)  | O(2)#1-Zn(1)-O(1)#3 | 89.7(2)  |
| O(2)#2-Zn(1)-O(1)#3 | 159.4(2) | O(1)-Zn(1)-O(1)#3   | 87.7(4)  |

<sup>a</sup>Symmetry codes for **1-DMF**: #1  $-x, y, -z + 1$ ; #2  $-x, -y, -z + 1$ ; #3  $x, -y, z$ .

**Table S3.** The cell parameter comparison of **1-DMF** and **MOF-2**.

| Parameter                  | <b>1-DMF</b> | <b>MOF-2</b>            |
|----------------------------|--------------|-------------------------|
| Crystal system             | Monoclinic   | Monoclinic              |
| Space group                | <i>C2/m</i>  | <i>P2<sub>1</sub>/n</i> |
| <i>a</i> (Å)               | 11.191(6)    | 6.718 (3)               |
| <i>b</i> (Å)               | 14.136(8)    | 15.488(7)               |
| <i>c</i> (Å)               | 7.975(5)     | 12.430(8)               |
| $\beta$ (°)                | 106.894(7)   | 102.83(4)               |
| <i>V</i> (Å <sup>3</sup> ) | 1207.2(12)   | 1261.0 (11)             |
